# Supplementary figures and images for: Evaluating endogenous viral targets as potential treatment monitoring surrogates for onsite non-potable water reuse
Source: Royal Society of Chemistry journal article supplement (doi:10.1039/d3ew00714f), 2024-01-01

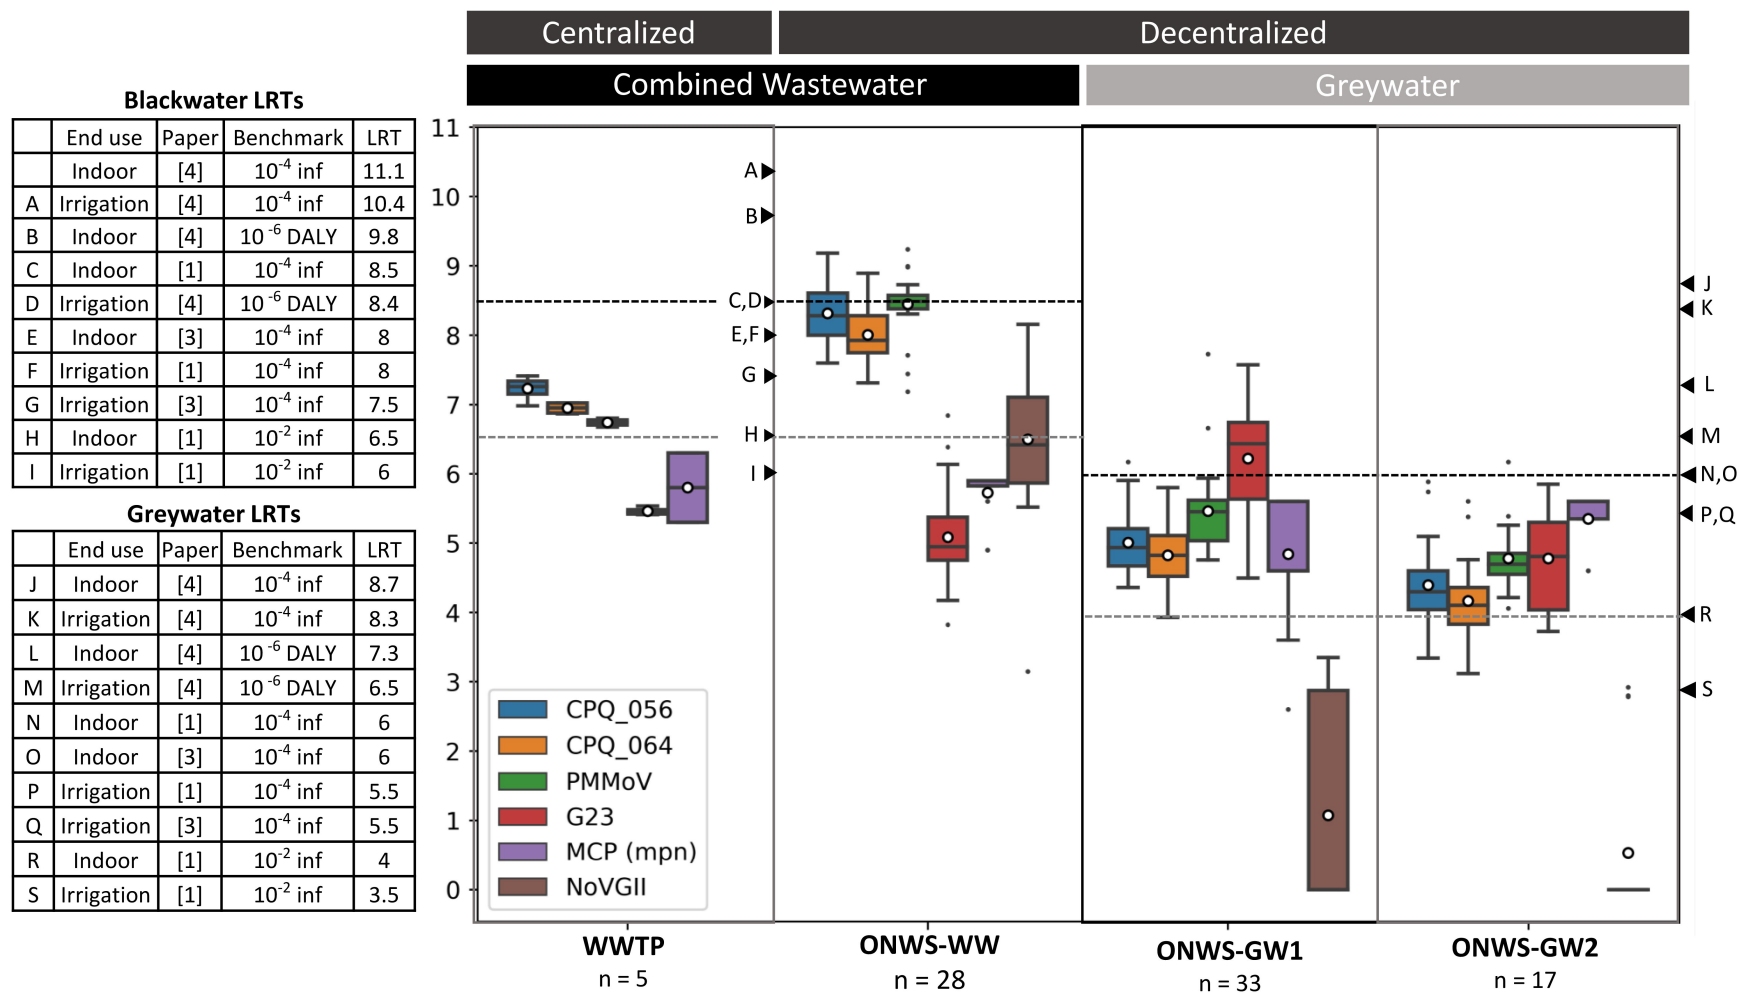

Supplement: d3ew00714f1.pdf [file d3ew00714f1.pdf]

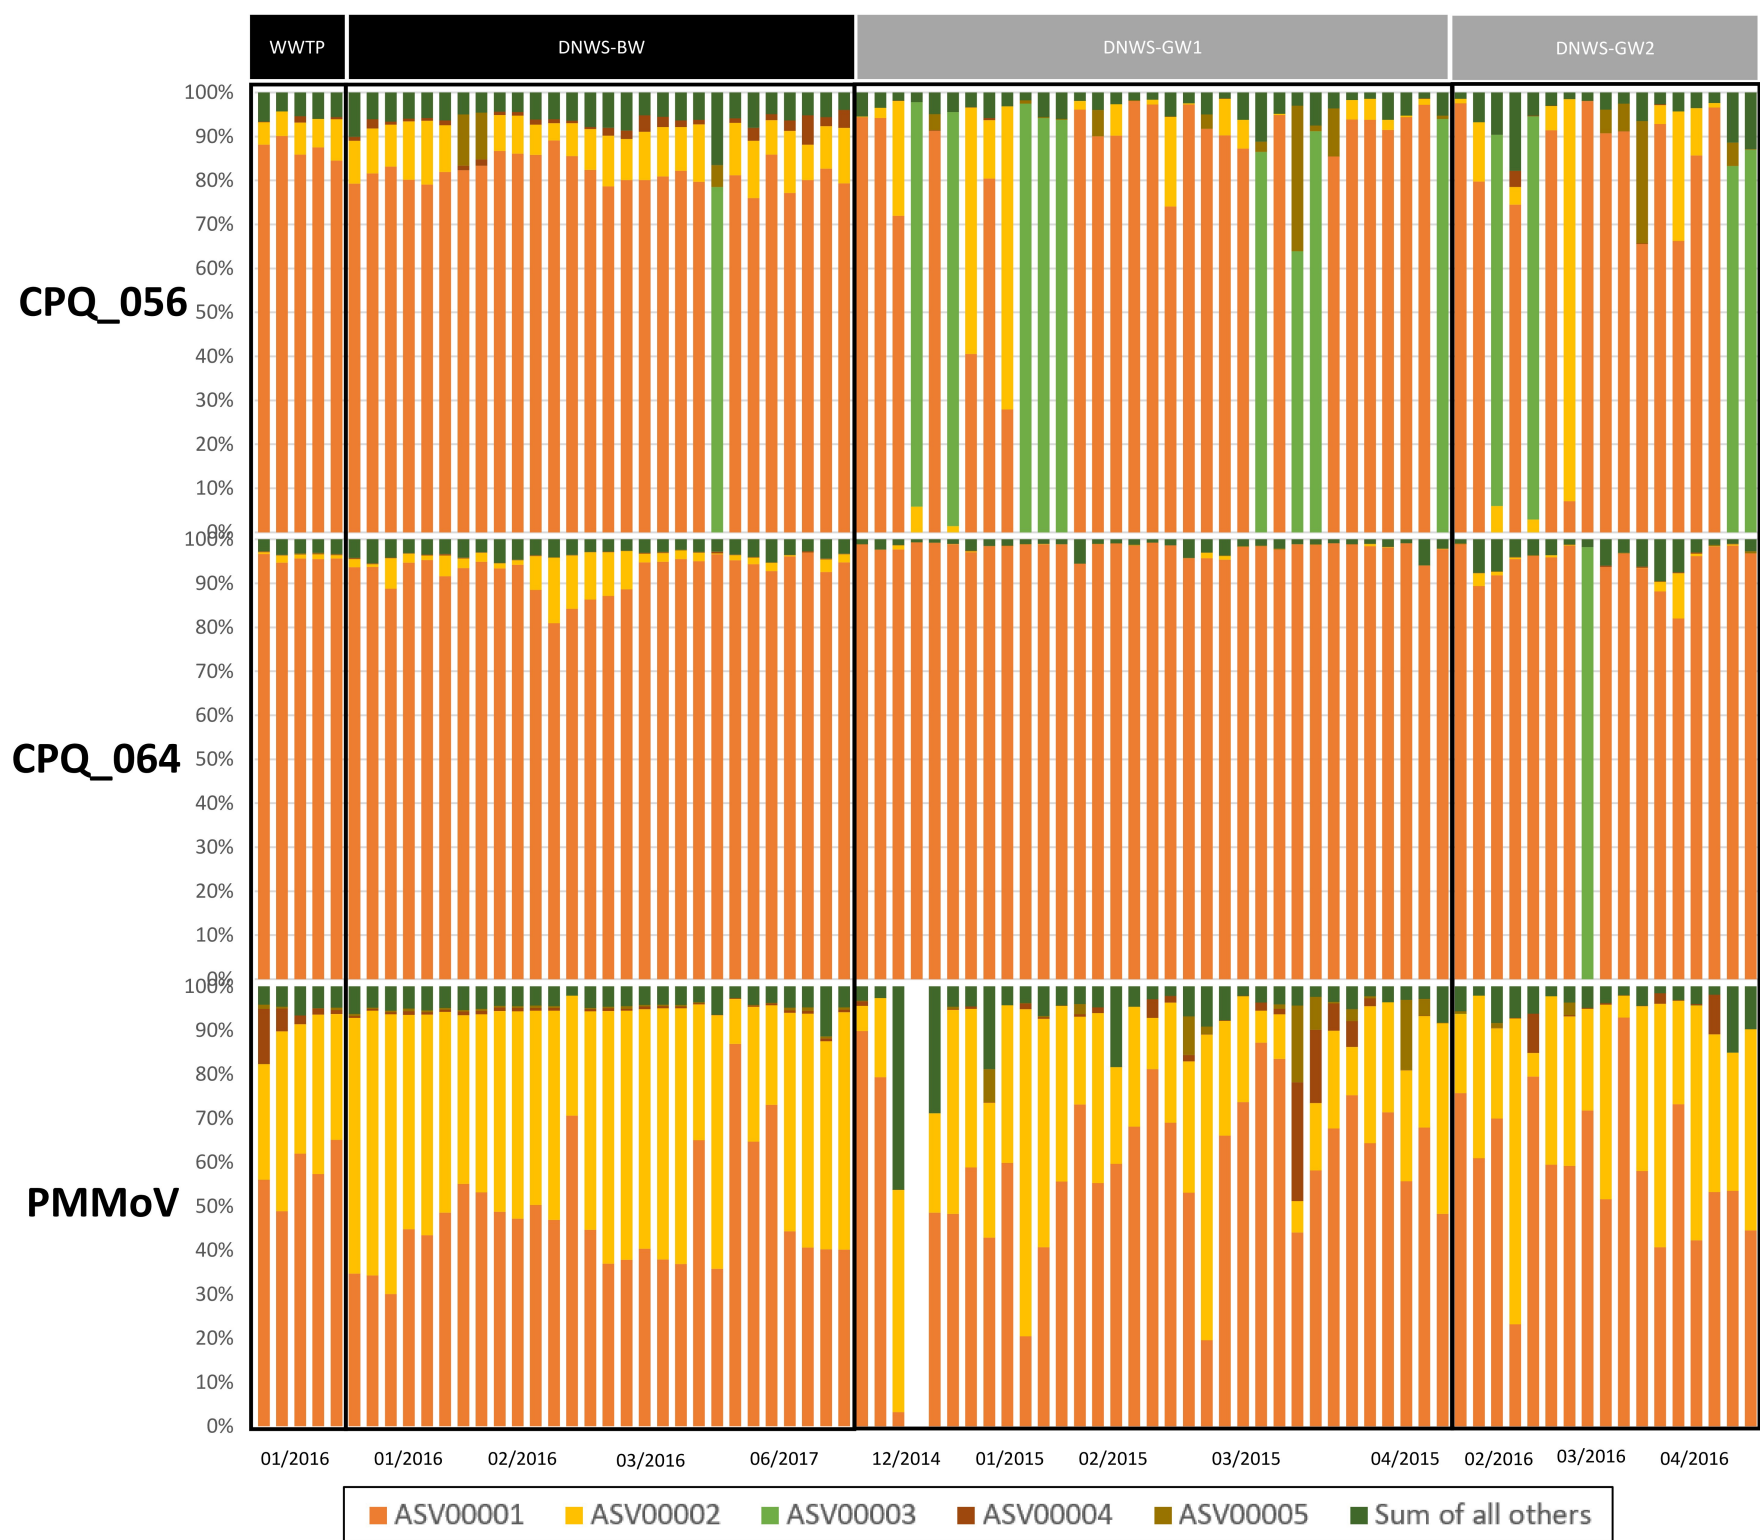

Supplement: d3ew00714f2.pdf [file d3ew00714f2.pdf]
